# Supplementary material
Source: Research Square preprint supplement (doi:10.21203/rs.3.rs-9581204/v1)
Supplement: Supplementary file 1 [file fb7b0af71b4ae5970dab0baa.docx]

**Table S1** List of qPCR primer sequences

| **Gene Target** | **Sequence** | **TM** | **Location (bp)** | **Size (bp)** |
| --- | --- | --- | --- | --- |
| *Cox IV* |  |  |  |  |
| Forward | CTGCCCGGAGTCTGGTAATG | 62 | 14-33 | 109 |
| Reverse | CAGTCAACGTAGGGGGTCATC | 61.9 | 122-102 |  |
| *Pgc-1a* |  |  |  |  |
| Forward | TATGGAGTGACATAGAGTGTGCT | 60.3 | 32-54 | 134 |
| Reverse | CCACTTCAATCCACCCAGAAAG | 60.8 | 165-144 |  |
| *Nrf1* |  |  |  |  |
| Forward | AGCACGGAGTGACCCAAAC | 62.2 | 8-26 | 90 |
| Reverse | TGTACGTGGCTACATGGACCT | 62.7 | 61-42 |  |
| *Atps* |  |  |  |  |
| Forward | CCCCTTCTACGACCGCTAC | 61.2 | 210-228 | 110 |
| Reverse | CCACTGGCTGCTTTCGGAA | 62.6 | 319-301 |  |
| *Core1* |  |  |  |  |
| Forward | CCTACAGCTTGTCGCCCTTT | 62.2 | 47-66 | 131 |
| Reverse | GATCAGGTAGACCACTACAAACG | 60.1 | 177-155 |  |
